# Supplementary material for: How Administration Stakes and Settings Affect Student Behavior and Performance on a Biology Concept Assessment
Source: Atypon-hosted journal article supplement (doi:10.1187/cbe.22-09-0181), 2023-04-28
Supplement: combinedsupmats.pdf [file combinedsupmats.pdf]

# Supplemental Material

*CBE—Life Sciences Education*

Uminski *et al.*

**How administration stakes and settings affect student behavior and performance  
on a biology concept assessment**

Crystal Uminski, Joanna K. Hubbard, Brian A. Couch

**Supplementary Materials – Table of contents**

|                                                                                          |   |
|------------------------------------------------------------------------------------------|---|
| Supplemental Figure 1: Item difficulty and discrimination (2015-2018).....               | 1 |
| Supplemental Table 1: Item difficulty and discrimination (2014).....                     | 2 |
| Supplemental Table 2: Linear mixed effects model predicting test completion time.....    | 3 |
| Supplemental Table 3: Fisher's z-tests of correlations of IMCA score and exam score..... | 4 |

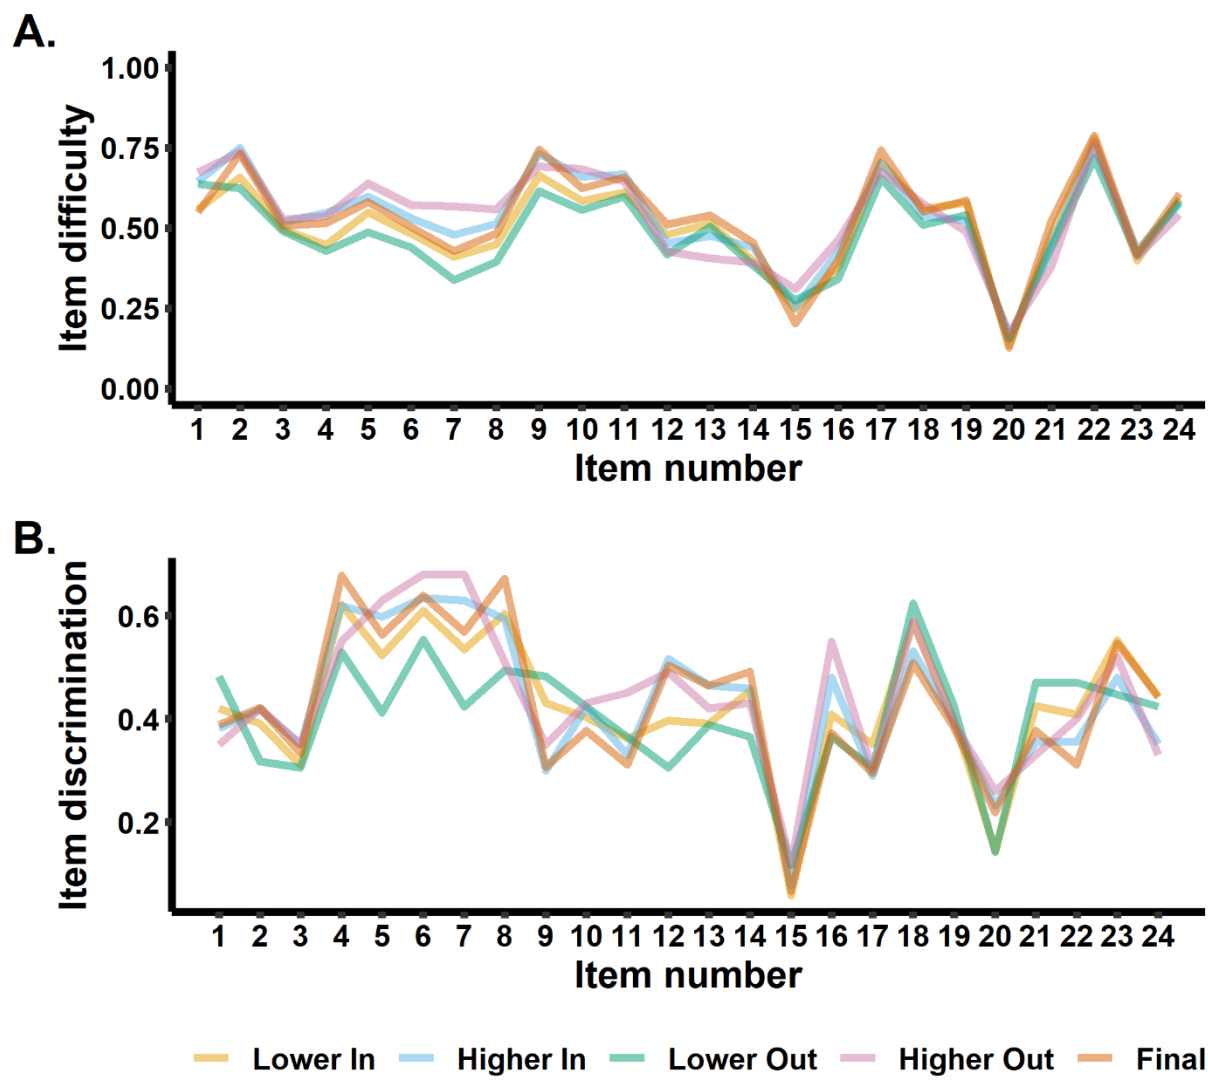

**Supplemental Figure 1. Item difficulty and discrimination values for each question on the IMCA in the different administration conditions.** The item number corresponds to the numbering scheme used in Shi et al., (2010). (A) Items with higher difficulty values indicate a higher proportion of students responded to the item correctly. (B) Items with a high discrimination value indicate that the item differentiated well between high- and low-performing students.

| Supplemental Table 1. Item difficulty and discrimination for the full-length IMCA instrument administered in 2014 |            |                |
|-------------------------------------------------------------------------------------------------------------------|------------|----------------|
| Item                                                                                                              | Difficulty | Discrimination |
| 1                                                                                                                 | 0.85       | 0.28           |
| 2                                                                                                                 | 0.86       | 0.24           |
| 3                                                                                                                 | 0.62       | 0.45           |
| 4                                                                                                                 | 0.6        | 0.81           |
| 5                                                                                                                 | 0.66       | 0.74           |
| 6                                                                                                                 | 0.69       | 0.74           |
| 7                                                                                                                 | 0.62       | 0.80           |
| 8                                                                                                                 | 0.69       | 0.62           |
| 9                                                                                                                 | 0.89       | 0.28           |
| 10                                                                                                                | 0.86       | 0.27           |
| 11                                                                                                                | 0.81       | 0.41           |
| 12                                                                                                                | 0.62       | 0.50           |
| 13                                                                                                                | 0.58       | 0.36           |
| 14                                                                                                                | 0.52       | 0.54           |
| 15                                                                                                                | 0.34       | 0.33           |
| 16                                                                                                                | 0.45       | 0.46           |
| 17                                                                                                                | 0.82       | 0.30           |
| 18                                                                                                                | 0.72       | 0.45           |
| 19                                                                                                                | 0.55       | 0.54           |
| 20                                                                                                                | 0.24       | 0.31           |
| 21                                                                                                                | 0.52       | 0.59           |
| 22                                                                                                                | 0.86       | 0.30           |
| 23                                                                                                                | 0.56       | 0.60           |
| 24                                                                                                                | 0.69       | 0.50           |

| Supplemental Table 2. Linear mixed effects model <sup>a</sup> on the effects of administration stakes and setting on concept assessment completion time |          |         |      |        |       |
|---------------------------------------------------------------------------------------------------------------------------------------------------------|----------|---------|------|--------|-------|
| Parameter                                                                                                                                               | Sum Sq   | Mean Sq | df   | F      | p     |
| Administration condition                                                                                                                                | 14807266 | 4935755 | 3    | 76.768 | <.001 |
| Post-hoc comparisons                                                                                                                                    |          |         |      |        |       |
| Contrast                                                                                                                                                | Estimate | SE      | df   | t      | p     |
| Higher In: Higher Out                                                                                                                                   | -218.4   | 16.9    | 1097 | -12.88 | <.001 |
| Higher In: Lower In                                                                                                                                     | 39.1     | 15.4    | 1888 | 2.55   | .053  |
| Higher In: Lower Out                                                                                                                                    | -19.6    | 19.0    | 1899 | -1.03  | .730  |
| Higher Out: Lower In                                                                                                                                    | 257.5    | 18.1    | 1900 | 14.24  | <.001 |
| Higher Out: Lower Out                                                                                                                                   | 198.8    | 21.2    | 1895 | 9.36   | <.001 |
| Lower In: Lower Out                                                                                                                                     | -58.7    | 18.6    | 1101 | -3.15  | .009  |
| Model R <sup>2</sup> = 0.22                                                                                                                             |          |         |      |        |       |
| <sup>a</sup> Completion time ~ administration condition + (1   ID)                                                                                      |          |         |      |        |       |

| Supplemental Table 3. Computations of Fisher's z-tests concerning differences between correlations of concept assessment score and average unit exam score |          |           |           |            |       |
|------------------------------------------------------------------------------------------------------------------------------------------------------------|----------|-----------|-----------|------------|-------|
|                                                                                                                                                            | Lower In | Higher In | Lower Out | Higher Out | Final |
| Lower In                                                                                                                                                   | -        | 0.405     | 0.190     | 0.017      | 0.007 |
| Higher In                                                                                                                                                  | 0.405    | -         | 0.013     | 0.009      | 0.010 |
| Lower Out                                                                                                                                                  | 0.190    | 0.013     | -         | 0.160      | 0.000 |
| Higher Out                                                                                                                                                 | 0.017    | 0.009     | 0.160     | -          | 0.000 |
| Final                                                                                                                                                      | 0.007    | 0.010     | 0.000     | 0.000      | -     |

Red text indicates significant differences in correlation values.
